# Supplementary material
Source: PubMed Central journal article supplement (PMC3566327)
Supplement: NIHMS410035-supplement-Supplementary_data.pdf [file NIHMS410035-supplement-Supplementary_data.pdf]

**MULTIFUNCTIONAL NANOBEACON FOR IMAGING THOMSEN-  
FRIEDENREICH ANTIGEN-ASSOCIATED COLORECTAL CANCER**

Hironori Kumagai<sup>1, 8</sup>, Wellington Pham<sup>1, 2, 3, 5, 6</sup>, Makoto Kataoka<sup>1, 9</sup>, Ken-ichiro  
Hiwatari<sup>8</sup>, James McBride<sup>7</sup>, Kevin J. Wilson<sup>1</sup>, Hiroyuki Tachikawa<sup>8</sup>, Ryoji Kimura<sup>8</sup>,  
Kunio Nakamura<sup>8</sup>, Eric H. Liu<sup>10</sup>, John C. Gore<sup>1, 2, 3, 4</sup>, Shinji Sakuma<sup>9</sup>

- (1) Institute of Imaging Science, Vanderbilt University, 1161, 21<sup>st</sup> Avenue South, Nashville, TN 37232
- (2) Department of Biomedical Engineering, Vanderbilt University, VU Station B 351620, Nashville, TN 37235
- (3) Vanderbilt Ingram Cancer Center, Vanderbilt University
- (4) Molecular Physiology and Biophysics, Vanderbilt University
- (5) Vanderbilt Institute of Chemical Biology
- (6) Neuroscience, Vanderbilt University
- (7) Department of Chemistry, Vanderbilt University, 7300 Stevenson Center, Station B, 351822, Nashville, TN 37235
- (8) Advanced Materials Laboratory, ADEKA Co., Tokyo, Japan
- (9) Faculty of Pharmaceutical Sciences, Setsunan University, Osaka, Japan
- (10) Division of Surgical Oncology and Endocrinology, Department of Surgery, Vanderbilt University School of Medicine, Nashville, TN 37232

**Figure S1.** Quantification of the amount of PNA per mg of the nanobeacon.

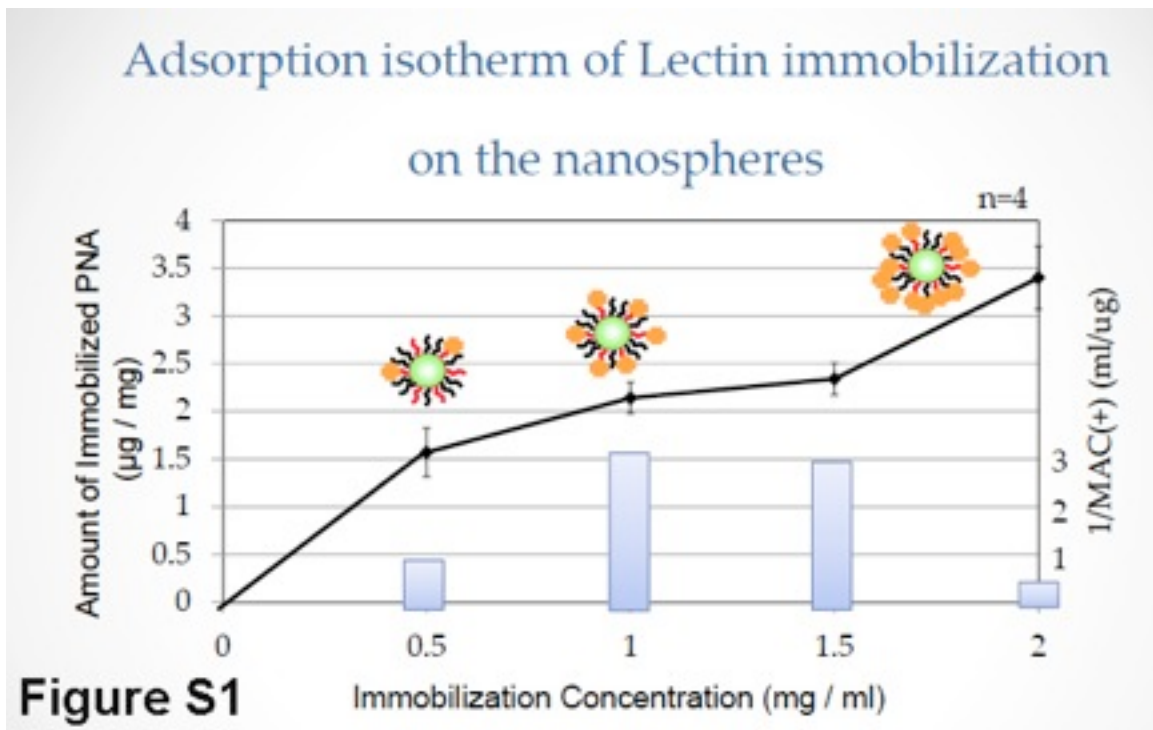

**Figure S2.** Quantification of the level of expression of TF on human colorectal tissue using in-housed program developed in Matlab.

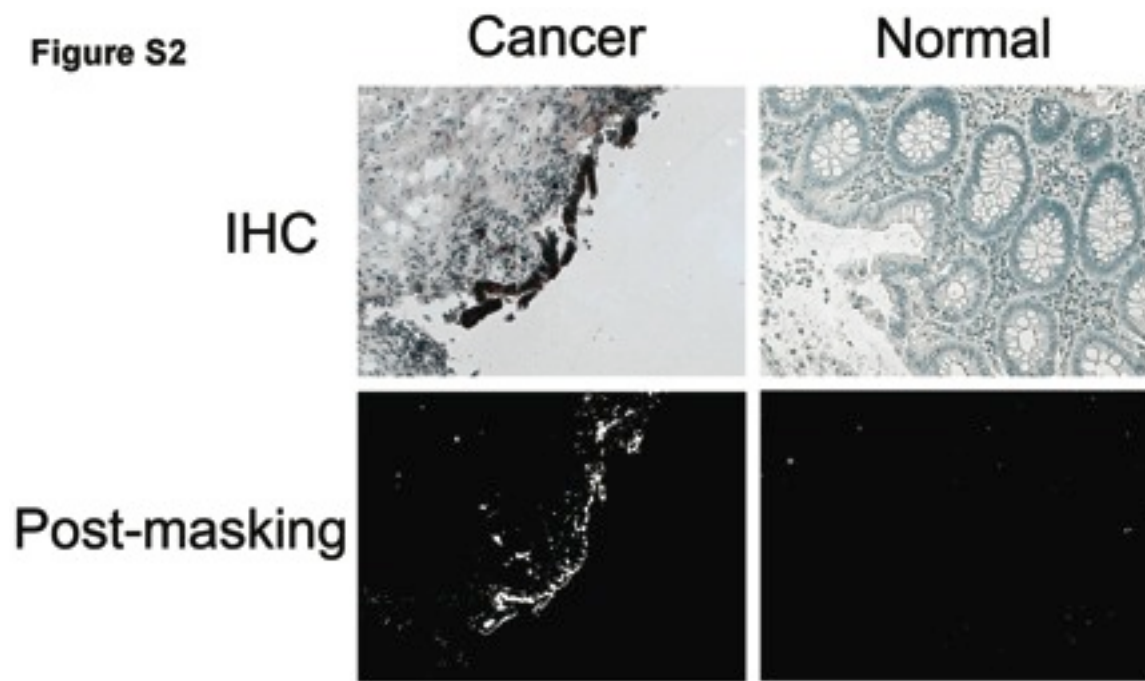

**Figure S3.** Quantification of the level of TF expression in Caco-2 cells after treatment of glycanase using FACS.

**Figure S3**

**Caco-2**

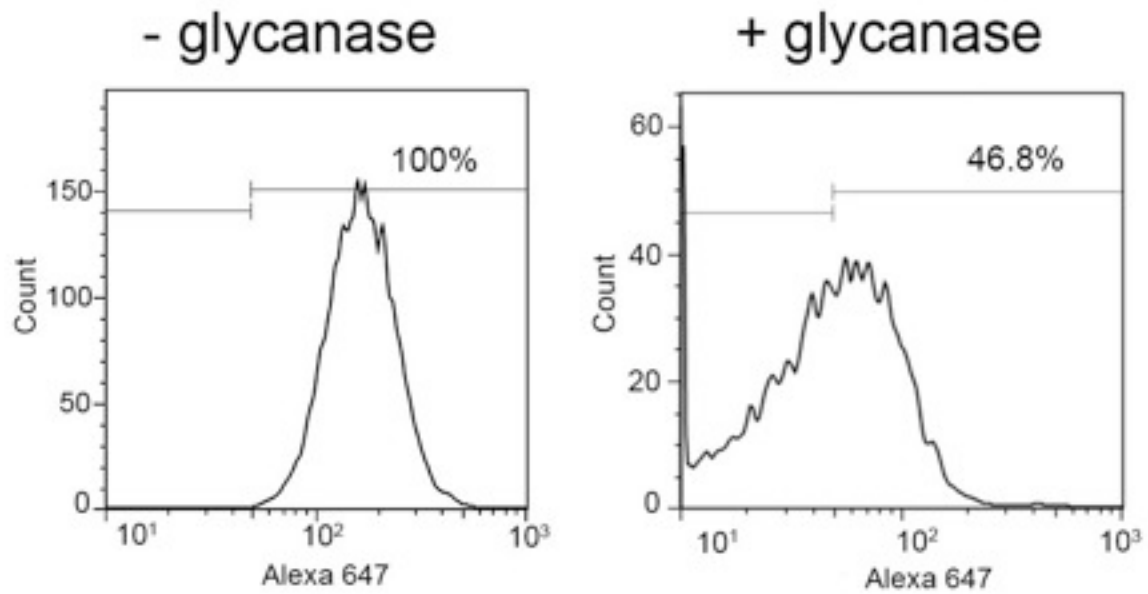

**Table S1.** Fine-tuning the nanobeacon by modifications of the polymers

| TableS1 In Feed [g(mmol)] |                         |            | Particle Size (nm)<br>(mean $\pm$ SD) | Zeta potential<br>(mV) |
|---------------------------|-------------------------|------------|---------------------------------------|------------------------|
| PNVA                      | PMAA                    | Styrene    |                                       |                        |
| 0.5 (0.13) <sup>a</sup>   | 0.5 (0.05) <sup>c</sup> | 1.0 (0.96) | 580 $\pm$ 95                          | -32.5                  |
| 1.5 (0.30) <sup>b</sup>   | 0.5 (0.09) <sup>d</sup> | 2.0 (19.2) | 530 $\pm$ 111                         | -0.3                   |
| 0.5 (0.10) <sup>b</sup>   | 1.5 (0.27) <sup>d</sup> | 2.0 (19.2) | 380 $\pm$ 52                          | -3.2                   |

<sup>a</sup> PNVA with weight- and number-average molecular weights ( $M_w/M_n$ ) of 9500/4000.

<sup>b</sup> PNVA with  $M_w/M_n$  of 14,000/5000.

<sup>c</sup> PMAA with  $M_w/M_n$  of 19,000/10,000.

<sup>d</sup> PMAA with  $M_w/M_n$  of 10,000/5600

**Table S2.** Oral distribution of the nanobeacon in a live orthotopic mouse model.

| Table S2        | Tissue weight (g) | Recovery (% of dose) |
|-----------------|-------------------|----------------------|
| Stomach         | 0.57 $\pm$ 0.14   | 46.7 $\pm$ 23.1      |
| Small intestine | 1.43 $\pm$ 0.26   | 3.6 $\pm$ 2.5        |
| Cecum           | 0.54 $\pm$ 0.15   | 24.1 $\pm$ 12.6      |
| Large intestine | 0.3 $\pm$ 0.02    | 10.3 $\pm$ 5.8       |
| Liver           | 1.1 $\pm$ 0.09    | 0.25 $\pm$ 0.09      |
| Kidney          | 0.42 $\pm$ 0.1    | n.d. <sup>b</sup>    |
| Blood           | - <sup>a</sup>    | 0.11 $\pm$ 0.01      |

<sup>a</sup> Approximately 0.2mL of blood collected from the abdominal artery

<sup>b</sup> Not detected
